# Supplementary material for: Machine Learning-based Classification of Diffuse Large B-cell Lymphoma Patients by Their Protein Expression Profiles
Source: PubMed Central journal article supplement (PMC4638038; doi:10.1074/mcp.m115.050245), 2015-08-26
Supplement: supp_M115.050245_mcp.M115.050245-2.pdf [file supp_M115.050245_mcp.M115.050245-2.pdf]

# Supplementary figure S2

TCL1A  
FOXP1

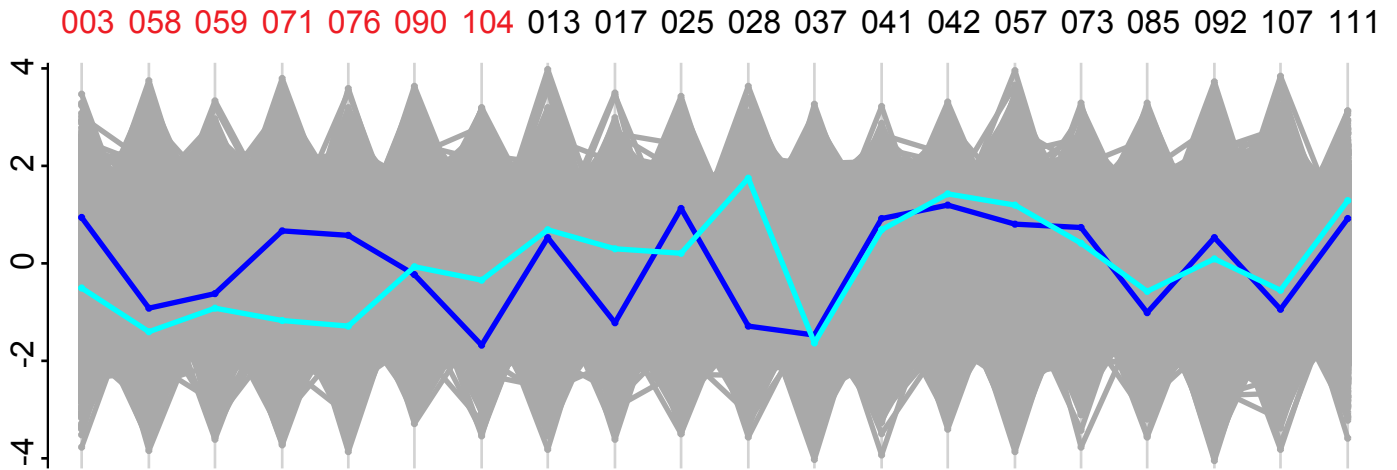

FIG. S2. Expression profiles of TCL1A and FOXP1 across patient samples. Patient samples highlighted in red correspond to GC-DLBCL patients and the ones highlighted in black correspond to ABC-DLBCL patients.
