# Supplementary material for: Machine Learning-based Classification of Diffuse Large B-cell Lymphoma Patients by Their Protein Expression Profiles
Source: PubMed Central journal article supplement (PMC4638038; doi:10.1074/mcp.m115.050245), 2015-08-26
Supplement: supp_M115.050245_mcp.M115.050245-3.pdf [file supp_M115.050245_mcp.M115.050245-3.pdf]

# Supplementary figure S3

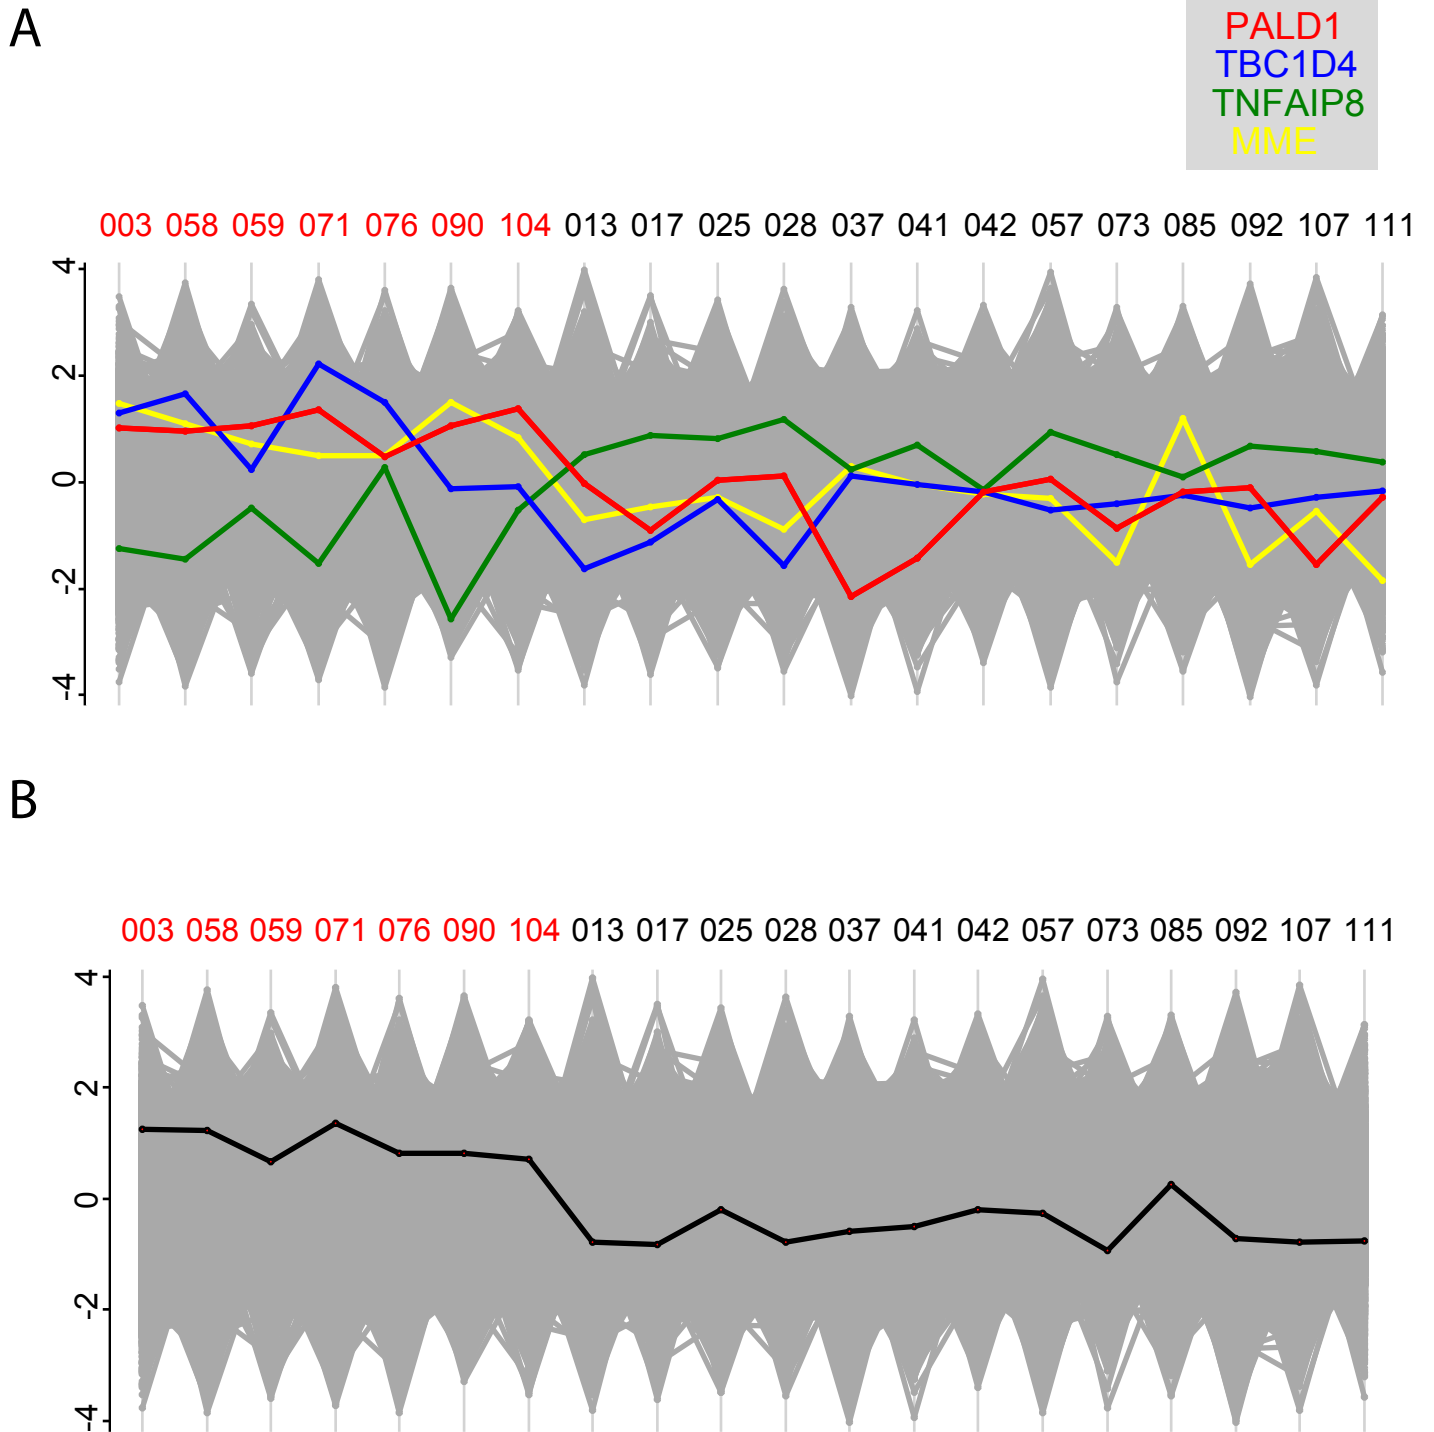

FIG. S3. A. Expression profiles of PALD1, TBC1D4, TNFAIP8 and MME across patient samples. Patient samples highlighted in red correspond to GC-DLBCL patients and the ones highlighted in black correspond to ABC-DLBCL patients. B. Average expression profile of PALD1, TBC1D4 and MME across patient samples.
