# Supplementary material for: Machine Learning-based Classification of Diffuse Large B-cell Lymphoma Patients by Their Protein Expression Profiles
Source: PubMed Central journal article supplement (PMC4638038; doi:10.1074/mcp.m115.050245), 2015-08-26
Supplement: supp_M115.050245_mcp.M115.050245-4.pdf [file supp_M115.050245_mcp.M115.050245-4.pdf]

# Supplementary figure S4

A

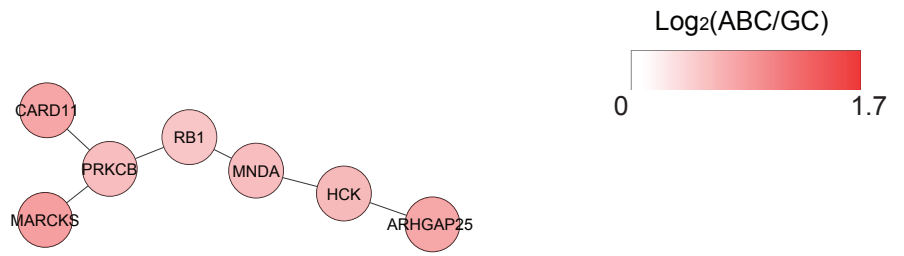

B

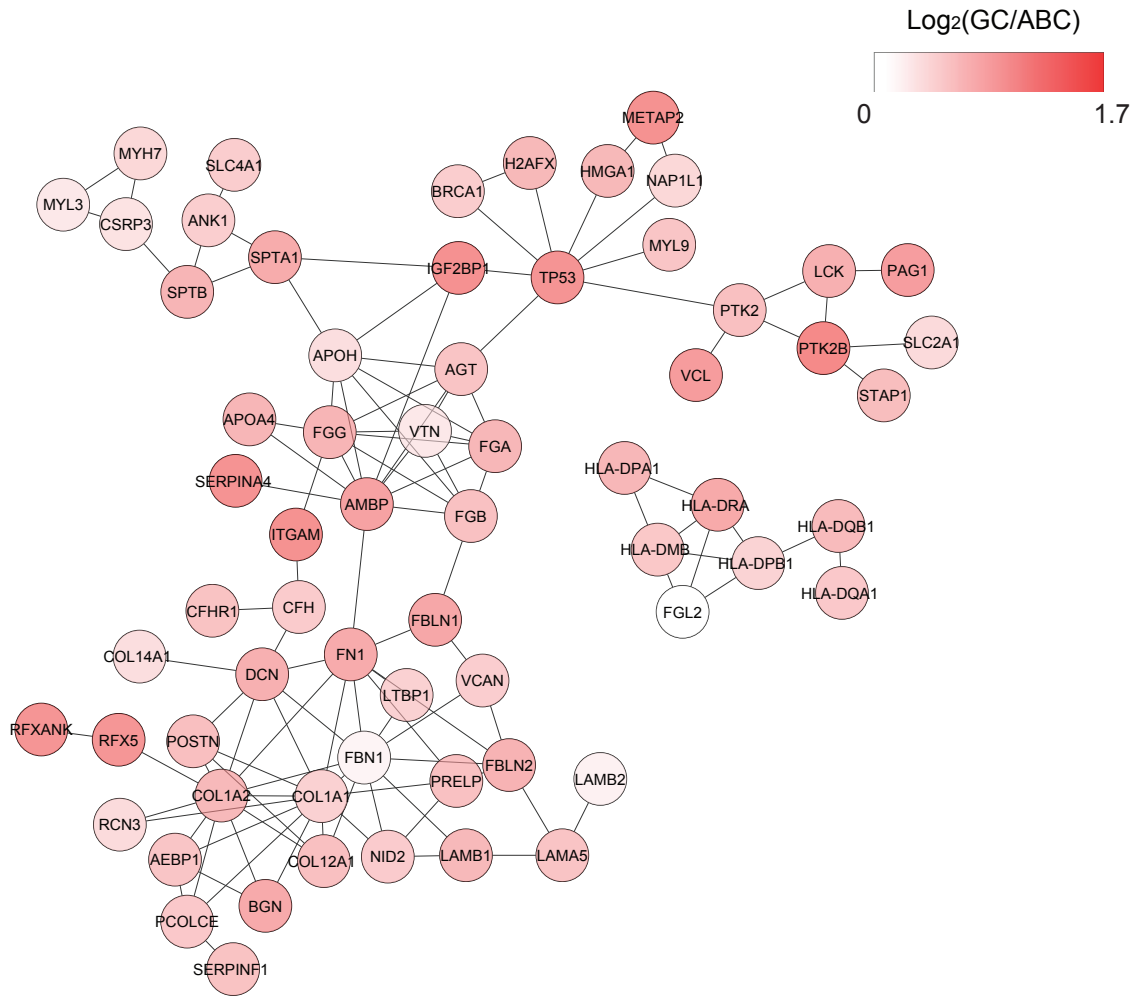

FIG. S4. Network analysis of proteins upregulated in ABC-DLBCL (A) and GCB-DLBCL (B).
