# Supplementary material for: Machine Learning-based Classification of Diffuse Large B-cell Lymphoma Patients by Their Protein Expression Profiles
Source: PubMed Central journal article supplement (PMC4638038; doi:10.1074/mcp.m115.050245), 2015-08-26
Supplement: supp_M115.050245_mcp.M115.050245-7.pdf [file supp_M115.050245_mcp.M115.050245-7.pdf]

# Supplementary table S3

## A

|                              | Cytokines and growth factors | Transcription factors | Cell differentiation markers | Protein Kinases | Translocated cancer genes | Oncogenes | Tumor suppressors |
|------------------------------|------------------------------|-----------------------|------------------------------|-----------------|---------------------------|-----------|-------------------|
| Tumor suppressors            | 0                            | 3                     | 0                            | 0               | 0                         | 0         | 5                 |
| Oncogenes                    | 0                            | 4                     | 0                            | 2               | 10                        | 12        |                   |
| Translocated cancer genes    | 0                            | 3                     | 0                            | 2               | 10                        |           |                   |
| Protein kinases              | 0                            | 0                     | 0                            | 14              |                           |           |                   |
| Cell differentiation markers | 0                            | 0                     | 11                           |                 |                           |           |                   |
| Transcription factors        | 0                            | 33                    |                              |                 |                           |           |                   |
| Cytokines and growth factors | 3                            |                       |                              |                 |                           |           |                   |

## B

| Cytokines and growth factors | Transcription factors                                                                                                                                                                                                                                                                    | Cell differentiation markers                                                             | Protein Kinases                                                                                               | Translocated cancer genes                                                        | Oncogenes                                                                                         | Tumor suppressors                     |
|------------------------------|------------------------------------------------------------------------------------------------------------------------------------------------------------------------------------------------------------------------------------------------------------------------------------------|------------------------------------------------------------------------------------------|---------------------------------------------------------------------------------------------------------------|----------------------------------------------------------------------------------|---------------------------------------------------------------------------------------------------|---------------------------------------|
| AGT<br>IL16<br>LTBP1         | BATF<br>BTAF1<br>CHD1<br>CHD2<br>CNPY3<br>CRIP2<br>CSRP3<br>DPF2<br>ERCC3<br>ETS1<br>FHL1<br>FOXP1<br>HLTF<br>HMGA1<br>IGHMBP2<br>IRF4<br>KAT5<br>LIMA1<br>LMO7<br>MED17<br>MED23<br>MNDNA<br>NCOR2<br>NFKBIB<br>RB1<br>REL<br>RELB<br>RFX5<br>RFXANK<br>SMAD5<br>SUB1<br>TP53<br>ZNF318 | ANPEP<br>BST2<br>CD22<br>CD44<br>CD9<br>ENTPD1<br>F11R<br>ITGAM<br>MME<br>SLC4A1<br>TLR9 | CAMK4<br>CDK6<br>HCK<br>IKBKE<br>LCK<br>LYN<br>MAP4K2<br>PDK1<br>PDK3<br>PRKCB<br>PTK2<br>PTK2B<br>SLK<br>TTN | BCL10<br>BCL2<br>CDK6<br>COL1A1<br>EML4<br>ERC1<br>FOXP1<br>HMGA1<br>IRF4<br>LCK | BCL10<br>BCL2<br>CARD11<br>CDK6<br>COL1A1<br>EML4<br>ERC1<br>FOXP1<br>HMGA1<br>IRF4<br>LCK<br>REL | BRCA1<br>ERCC3<br>PMS1<br>RB1<br>TP53 |
